# Supplementary material for: Intestinal helminthiasis survey with emphasis on schistosomiasis in Koga irrigation scheme environs, northwest Ethiopia
Source: PubMed Central journal article supplement (PMC9359581; doi:10.1371/journal.pone.0272560), 2022-08-08
Supplement: pone.0272560.s001.pdf [file pone.0272560.s001.pdf]

**Questionnaire for a study on intestinal helminthiasis survey with emphasis on schistosomiasis in Koga irrigation scheme environs, Northwest Ethiopia.**

Identification No. \_\_\_\_\_

**Direction:** Check the appropriate option or enter numbers or write the appropriate phase as required

001. Attending school name
1. Mengesha Jemberie Primary School
  2. Merawi Primary School
  3. Wotet Abay Primary School
002. Sex of the student
1. Male
  2. Female
003. Age of the student (years, months): \_\_\_\_\_
004. Religion of the student
1. Orthodox
  2. Muslim
  3. Protestant
  4. Others(specify) \_\_\_\_\_
005. Mother's education:
1. Illiterate
  2. Read and rite
  3. Primary education
  4. Secondary and above
006. Father's education
1. Illiterate
  2. Read and rite
  3. Primary education
  4. Secondary and above
007. Mother's occupation
1. House wife
  2. Merchant
  3. Government employee
  4. Private employee
008. Father's occupation
1. House wife
  2. Merchant
  3. Government employee
  4. Private employee
009. Residence of the student (specify kebele name)
1. Urban: Kebele name \_\_\_\_\_
  2. Rural: Kebele name \_\_\_\_\_
010. Grade level of the student: \_\_\_\_\_

011. Ethnicity of the student
1. Amhara
  2. Agew
  3. Others(specify): \_\_\_\_\_
012. Do you wear shoes?
1. Never
  2. Sometimes
  3. Always
013. If the response to question#107 is 2 or 3, what type of shoes do you wear?
1. Open shoes
  2. Closed shoes
014. Water source for student's household
1. Tap water
  2. Protected dug well
  3. Protected spring
  4. Unprotected spring
015. Adequacy of school latrine as per the standard:
1. Not adequate
  2. Adequate
016. Do you use the school latrines?
1. Never
  2. Sometimes
  3. Always
017. For those replied '1' or '2' for Q #016; why don't you use it always?
1. Not clean
  2. Not enough
  3. Feeling uncomfortable
018. For those replied '1' or '2' for Q #017; where do you defecate instead?
1. Latrine outside the school compound
  2. Openly in the bush around the school
019. Water source for school
1. Tap water
  2. Protected dug well
020. Frequency of water supply interruption in school
1. Never
  2. Rarely
  3. about 1-2 days/week
  4. three and above days/week
021. School had handwashing facility near toilets
1. No
  2. Yes
022. Handwashing after meal
1. Never
  2. Sometimes
  3. Always
023. Handwashing after defecation
1. Never
  2. Sometimes
  3. Always
