# Supplementary material for: Intestinal helminthiasis survey with emphasis on schistosomiasis in Koga irrigation scheme environs, northwest Ethiopia
Source: PubMed Central journal article supplement (PMC9359581; doi:10.1371/journal.pone.0272560), 2022-08-08
Supplement: pone.0272560.s002.pdf [file pone.0272560.s002.pdf]

**የአንጀት ጥገኛ ትላትሎች በተለይም የቢልሃርዚያን ስርጭት በሰሜን ምዕራብ ኢትዮጵያ ቆጋ የመስኖ ልማት አካባቢ ለማጥናት የተዘጋጀ መጠይቅ**

መለያ ቁጥር. \_\_\_\_\_

**መመሪያ:** ትክክለኛውን ምርጫ ምልክት ያድርጉ፤ ቁጥሩን ያስገቡ ወይንም ትክክለኛውን ሃረግ ይፃፉ

001. የሚማሩበት ትምህርት ቤት ስም

1. መንገሻ ጀምበሬ የመጀመሪያ ደረጃ ት/ቤት
2. መራዊ የመጀመሪያ ደረጃ ት/ቤት
3. ወተት ዓባይ የመጀመሪያ ደረጃ ት/ቤት

002. ያታ

1. ወንድ
2. ሴት

003. እድሜ(አመት, ወር): \_\_\_\_\_

004. ሃይማኖት

1. ኦርቶዶክስ
2. እስልምና
3. ፕሮቴስታንት
4. ሌላ(ይጥቀሱ) \_\_\_\_\_

005. የእናት የትምህርት ደረጃ:

1. ምንም ያልተማሩ
2. ማንበብና መፃፍ
3. የመጀመሪያ ደረጃ
4. ሁለተኛ ደረጃና በላይ

006. የአባት የትምህርት ደረጃ:

1. ምንም ያልተማሩ
2. ማንበብና መፃፍ
3. የመጀመሪያ ደረጃ
4. ሁለተኛ ደረጃና በላይ

007. የእናት ስራ

1. የቤት አመቤት
2. ነጋዴ
3. የመንግስት ሰራተኛ
4. የግል ስራ

008. የአባት ስራ

1. ገበሬ
2. ነጋዴ
3. የመንግስት ስራ
4. የግል ስራ

009. አድራሻ

1. ከተማ \_\_\_\_\_
2. ገጠር

010. የክፍል ደረጃ: \_\_\_\_\_

011. ብሄር

1. አማራ
2. አገጢ

3. ሌላ(ይጠቀስ): \_\_\_\_\_

012. ጫማ የመልበስ ልምድ አለህ/ሽ?

- 1. የለም
- 2. አልፎ አልፎ
- 3. ሁልጊዜ

013. ለጥያቄ#012፤ 2 ወይም 3 ለመለሱ፣ ምን አይነት ጫማ ነው የሚጫሙት?

- 1. ክፍት
- 2. ሽፍን

014. በቤት ውስጥ የሚጠቀሙት ዉሃ

- 1. የቧንቧ ዉሃ
- 2. ያልተጠበቀ የጉድጓድ ዉሃ
- 3. የተጠበቀ የጉድጓድ ዉሃ
- 4. ያልተጠበቀ የምንጭ ዉሃ

015. የትምህርት ቤቱ መጻፍት ለተማሪዎቹ ቁጥር በቂ ነው? (በስታንዳርዱ መሰረት):

- 1. በቂ አየደለም
- 2. በቂ ነው

016. የትምህርት ቤታችሁን መጻፍት ቤት ይጠቀማሉ?

- 1. አልጠቀምም
- 2. አልፎ አልፎ
- 3. ሁልጊዜ

017. ለጥያቄ #016 መልሳቸው 1 ወይም 2 ለመለሱ፣ ለምንድን ነው የሚይጠቀሙት?

- 1. ንፁህ ስላልሆነ
- 2. በቂ ስላልሆነ
- 3. ነፃነት ስለማይሰማኝ

018. ለጥያቄ #016 መልሳቸው 1 ወይም 2 ለመለሱ; የት ነው የሚጸዱት?

- 1. ከትምህርት ቤት ዉጭ ካለ መጻፍት ቤት
- 2. ዉጭ ላይ፤ ጫካ ውስጥ

019. የትምህርት ቤት ዉሃ አቅርቦት

- 1. የቧንቧ ዉሃ
- 2. የተጠበቀ የጉድጓድ ዉሃ

020. በትምህርት ቤት ዉሃ የመቆራረጥ ሁኔታ

- 1. የለም
- 2. አንዳንዴ
- 3. 1-2 ቀን በሳምንት
- 4. ከ 3 ቀን በላይ በሳምንት

021. ሽንት ቤት አካባቢ የእጅ መታጠቢያ አለ

- 1. የለም
- 2. አለ

022. ከምግብ በሁዋላ እጅ የመታጠብ ልምድ

- 1. የለም
- 2. አልፎ አልፎ
- 3. ሁልጊዜ

023. ከተጸዱ በሁዋላ እጅ የመታጠብ ልምድ

- 1. የለም
- 2. አልፎ አልፎ
- 3. ሁልጊዜ

024. ከትምህርት ቤታችሁ አቅራቢያ ወዳለው ወንዝ/ምንጭ የመሄድ ልምድ አለህ/ሽ?

- 1. የለም
- 2. አልፎ አልፎ
- 3. ሁልጊዜ
