# Supplementary material for: Intestinal helminthiasis survey with emphasis on schistosomiasis in Koga irrigation scheme environs, northwest Ethiopia
Source: PubMed Central journal article supplement (PMC9359581; doi:10.1371/journal.pone.0272560), 2022-08-08
Supplement: pone.0272560.s005.pdf [file pone.0272560.s005.pdf]

**S1 Table. Association of sex and age with water contact characteristics of school aged children among study participants in Northwest Ethiopia, N=421.**

|                     |                 | <b>Water contact</b> |                 | <b>P-value</b> |
|---------------------|-----------------|----------------------|-----------------|----------------|
| <b>Variable</b>     | <b>Category</b> | <b>Yes, n(%)</b>     | <b>No, n(%)</b> |                |
| <b>Sex</b>          | <b>Female</b>   | 112(60.2)            | 74(39.8)        | 0.005          |
|                     | <b>Male</b>     | 173(73.6)            | 62(26.4)        |                |
| <b>Age in years</b> | <b>5-10</b>     | 118(59.3)            | 81(40.7)        | 0.001          |
|                     | <b>11-15</b>    | 167(75.2)            | 55(24.8)        |                |
